# Supplementary material for: Development of Bag-1L as a therapeutic target in androgen receptor-dependent prostate cancer
Source: eLife journal article supplement (doi:10.7554/elife.27159), 2017-08-08
Supplement: supp [file elife-27159-supp-v1.zip]

Archive with 26 entries (26 files):
- elife_poa_e27159_Figure_1_source_data_1.xlsx
- elife_poa_e27159_Figure_6_figure_supplement_1.pdf
- elife_poa_e27159_Table_1_source_data_1.docx
- elife_poa_e27159_Figure_2_source_data_2.xlsx
- elife_poa_e27159_Figure_3_source_data_1.docx
- elife_poa_e27159_Figure_5_figure_supplement_4.pdf
- elife_poa_e27159_Figure_1_figure_supplement_2.pdf
- elife_poa_e27159_Figure_1_figure_supplement_1.pdf
- elife_poa_e27159_Figure_2_figure_supplement_1.pdf
- elife_poa_e27159_Figure_6_figure_supplement_2.pdf
- elife_poa_e27159_Figure_2_figure_supplement_6.pdf
- elife_poa_e27159_Figure_2_figure_supplement_4.pdf
- elife_poa_e27159_Figure_6_figure_supplement_3.pdf
- elife_poa_e27159_Figure_2_figure_supplement_2.pdf
- elife_poa_e27159_Figure_2_figure_supplement_5.pdf
- elife_poa_e27159_Figure_6_figure_supplement_5.pdf
- elife_poa_e27159_Figure_5_figure_supplement_2.pdf
- elife_poa_e27159_Figure_1_figure_supplement_3.pdf
- elife_poa_e27159_Figure_2_source_data_1.zip
- elife_poa_e27159_Figure_5_figure_supplement_5.pdf
- elife_poa_e27159_Figure_5_figure_supplement_1.pdf
- elife_poa_e27159_Figure_2_figure_supplement_3.pdf
- elife_poa_e27159_Figure_5_figure_supplement_3.pdf
- elife_poa_e27159_Table_1_source_data_2.docx
- elife_poa_e27159_Transparent_Reporting_File.docx
- elife_poa_e27159_Figure_4_figure_supplement_4.pdf
