# Supplementary material for: Development of Bag-1L as a therapeutic target in androgen receptor-dependent prostate cancer
Source: eLife journal article supplement (doi:10.7554/elife.27159), 2017-08-08
Supplement: supp [file elife-27159-supp-v1.zip › elife_poa_e27159_Figure_1_source_data_1.xlsx]

## Sheet: Direct AR target genes
Common genes	Common up-regulated genes	Common down-regulated genes	Control only genes	Control only up-regulated genes	Control only down-regulated genes	KO only genes	KO only up-regulated genes	KO only down-regulated genes
ABCA1	ABCC1	ABCA1	SEPT11	ABHD3	SEPT11	AAK1	AAK1	BEND7
ABCC1	ABCC4	ADD3	ABCB11	ACAA1	ABCB11	ARSG	ARSG	DCLK1
ABCC4	ABHD2	AK5	ABHD3	ACAD8	ACACB	BBS4	BBS4	DSG4
ABHD2	ADAM7	BCHE	ACAA1	ACADL	ALB	BEND7	C2orf27A	FBN1
ADAM7	ADAM9	CACHD1	ACACB	ACOT9	ANTXR1	C2orf27A	C9orf91	INSIG2
ADAM9	ADPRM	COLCA1	ACAD8	ACOX3	AR	C9orf91	CCDC40	KALRN
ADD3	AFF3	CPAMD8	ACADL	ACSL3	ARHGAP29	CCDC40	CHN2	KCNMB4
ADPRM	AGR2	CTTNBP2	ACOT9	ACSM1	ARL15	CHN2	CLDN8	KIAA1217
AFF3	AKAP1	DDC	ACOX3	ACVR2A	ATG16L2	CLDN8	DLG2	LINC00673
AGR2	AKAP12	FAM134B	ACSL3	ADAMTS1	ATP2B1	DCLK1	DNAJC1	LNX2
AK5	ALPK3	FAM135B	ACSM1	ADH1C	ATP8A1	DLG2	EGFR	LYPD6B
AKAP1	ANGPT2	FOLH1	ACVR2A	ADRB1	AUTS2	DNAJC1	ELOVL2-AS1	NRXN1
AKAP12	ARAP2	GALNT3	ADAMTS1	AHNAK	BHLHE41	DSG4	ENDOD1	OPRK1
ALPK3	ARHGAP26	GCLC	ADH1C	ALDH1A1	BIN1	EGFR	FECH	PARM1
ANGPT2	ASRGL1	GLI3	ADRB1	ALDH1A3	BMP6	ELOVL2-AS1	FOXJ1	PDE4D
ARAP2	ATAD2	GOLIM4	AHNAK	ALPK2	BMX	ENDOD1	FSIP1	SESN1
ARHGAP26	ATP1A1	GUSBP1	ALB	ANKH	BOK	FBN1	GBF1	SPOCK2
ASRGL1	BCAP29	LOC145837	ALDH1A1	ANXA2	C1QTNF3	FECH	GHRHR	TGM3
ATAD2	BEND4	MAP2K6	ALDH1A3	APLN	C20orf197	FOXJ1	GNAL
ATP1A1	C1orf116	MYLK	ALPK2	ARHGAP28	CADM1	FSIP1	GNB4
BCAP29	C1orf21	NAV3	ANKH	ASAH1	CCDC83	GBF1	HEY2
BCHE	C2orf76	PAG1	ANTXR1	ATF3	CD83	GHRHR	HK2
BEND4	CAMKK2	PLCH1	ANXA2	ATOH8	CDCA7	GNAL	IGF1
C1orf116	CAP2	PLD1	APLN	ATP1A2	CDCA7L	GNB4	IL1R1
C1orf21	CAPZB	POLR2M	AR	ATP8B2	CDH26	HEY2	MCCC2
C2orf76	CARTPT	RASSF8	ARHGAP28	B2M	CHML	HK2	MEF2C
CACHD1	CCDC136	RIN2	ARHGAP29	B3GAT1	CMPK2	IGF1	MICAL2
CAMKK2	CCDC141	SI	ARL15	B4GALT1	CNKSR3	IL1R1	MPHOSPH9
CAP2	CDC42EP3	STXBP6	ASAH1	BCL2L1	COL2A1	INSIG2	NSMAF
CAPZB	CDK6	TLE1	ATF3	BEST3	CYP2J2	KALRN	NXPE3
CARTPT	CENPN	TMEM65	ATG16L2	BMPR1B	DAPK1	KCNMB4	PEX10
CCDC136	CHRNA2	TNFAIP2	ATOH8	C8orf4	DIXDC1	KIAA1217	PHACTR2
CCDC141	CNDP2	TNS1	ATP1A2	C9orf152	DPYSL5	LINC00673	PKP1
CDC42EP3	CNKSR2	TOX3	ATP2B1	CADPS2	EBF2	LNX2	PPFIBP1
CDK6	CORO2A	TSPAN8	ATP8A1	CALU	EXPH5	LYPD6B	RANBP3L
CENPN	CSGALNACT1	UGT8	ATP8B2	CAPN2	EYA2	MCCC2	SLC25A20
CHRNA2	CTNNA2	YPEL2	AUTS2	CBLL1	FAM111A	MEF2C	SLC2A12
CNDP2	CUX2	ZAK	B2M	CCDC149	FAM117B	MICAL2	SMURF1
CNKSR2	DHCR24	ZBTB7C	B3GAT1	CDK2AP2	FAM198B	MPHOSPH9	TACC2
COLCA1	DLX1		B4GALT1	CDKN1A	FAM46C	NRXN1	UAP1
CORO2A	DNAJB9		BCL2L1	CDKN2B	FFAR2	NSMAF	ZBTB25
CPAMD8	DNM1L		BEST3	CDR2	FIGNL1	NXPE3	ZC3HAV1
CSGALNACT1	DOCK4		BHLHE41	CDYL2	FLNB	OPRK1
CTNNA2	DOCK8		BIN1	CFAP69	FOXQ1	PARM1
CTTNBP2	DUOX1		BMP6	CHD3	FRMD3	PDE4D
CUX2	EDEM3		BMPR1B	CHKA	FRY	PEX10
DDC	EFCAB12		BMX	CITED2	GC	PHACTR2
DHCR24	ELK4		BOK	CLDN12	GLCCI1	PKP1
DLX1	ELL2		C1QTNF3	COLGALT2	GPER1	PPFIBP1
DNAJB9	ELOVL7		C20orf197	CPEB3	GRAMD2	RANBP3L
DNM1L	EPN2		C8orf4	CPEB4	GRB10	SESN1
DOCK4	ERN1		C9orf152	CTTN	HMGCS2	SLC25A20
DOCK8	ERRFI1		CADM1	CYTH1	HOXC13	SLC2A12
DUOX1	FADS1		CADPS2	DCDC2	HSD3B1	SMURF1
EDEM3	FAM105A		CALU	DNAJC12	IGSF3	SPOCK2
EFCAB12	FAM110B		CAPN2	DSC1	JAKMIP1	TACC2
ELK4	FAM174B		CBLL1	EAF2	KBTBD11	TGM3
ELL2	FAM189A2		CCDC149	ECI2	KCNN3	UAP1
ELOVL7	FASN		CCDC83	EDEM1	KDM6A	ZBTB25
EPN2	FBXO31		CD83	EEF2K	KIAA1467	ZC3HAV1
ERN1	FGD4		CDCA7	EIF2AK3	KLHL13
ERRFI1	FKBP5		CDCA7L	ELOVL5	LGI2
FADS1	FNBP1L		CDH26	EPS15	LPPR1
FAM105A	FRK		CDK2AP2	ETNK2	LRIG3
FAM110B	FRYL		CDKN1A	EXOC8	LRRC4C
FAM134B	FZD8		CDKN2B	EXTL2	MAN1A1
FAM135B	GADD45G		CDR2	F2RL1	MANBA
FAM174B	GLRX2		CDYL2	F5	MANEA
FAM189A2	GOLGA4		CFAP69	FAM111B	MATN2
FASN	GREB1		CHD3	FAM13C	MCTP1
FBXO31	HEBP2		CHKA	FAM214A	NCAM2
FGD4	HERC3		CHML	FAM214B	NEURL1
FKBP5	HES6		CITED2	FNDC3B	NFATC2
FNBP1L	HIPK2		CLDN12	FOXO3	PALMD
FOLH1	HK1		CMPK2	G3BP2	PAQR5
FRK	HMGXB3		CNKSR3	GCNT2	PARD3B
FRYL	HOMER2		COL2A1	GDF15	PCAT1
FZD8	HS3ST4		COLGALT2	GFM1	PGAP1
GADD45G	IGF1R		CPEB3	GLRX	PIGZ
GALNT3	IL6R		CPEB4	GLUL	PIK3R1
GCLC	IQGAP2		CTTN	GNMT	PKIB
GLI3	ITGAV		CYP2J2	GOLGA3	PKNOX2
GLRX2	JAG1		CYTH1	GOSR2	PLEKHH1
GOLGA4	KCNMA1		DAPK1	GP2	PPFIA2
GOLIM4	KCNN2		DCDC2	GRHL2	PREX1
GREB1	KCTD3		DIXDC1	GRIP1	PRUNE2
GUSBP1	KDM4B		DNAJC12	GTF2E2	PTGS1
HEBP2	KDM7A		DPYSL5	GTF3C6	PTK7
HERC3	KIAA1324L		DSC1	HES1	PTP4A3
HES6	KIF5C		EAF2	HGD	PTPRU
HIPK2	KLF15		EBF2	HIST1H4H	RASL11B
HK1	KLHL29		ECI2	HMGCR	RAVER2
HMGXB3	KLK2		EDEM1	HMGCS1	RIT2
HOMER2	KLK3		EEF2K	HSD17B4	RNF144A
HS3ST4	L3MBTL3		EIF2AK3	IGFBP3	RNF144B
IGF1R	LACTB2		ELOVL5	INPP4B	SCUBE2
IL6R	LAMA1		EPS15	IP6K3	SGMS1
IQGAP2	LDLRAD3		ETNK2	IQUB	SLC16A10
ITGAV	LIMCH1		EXOC8	ISG20	SLC25A48
JAG1	LINC00883		EXPH5	KANSL1L	SLC27A2
KCNMA1	LONRF1		EXTL2	KCNH2	SLC30A4
KCNN2	LPAR3		EYA2	KCTD1	SLC7A2
KCTD3	MAP7D1		F2RL1	KIAA0232	SLIT3
KDM4B	MAP9		F5	KIF13B	SMOC2
KDM7A	MAPK6		FAM111A	KLF4	SORL1
KIAA1324L	MBOAT2		FAM111B	KLF5	SOWAHB
KIF5C	MERTK		FAM117B	KLF6	SPRY1
KLF15	MICAL1		FAM13C	KRT16	SRGAP3
KLHL29	MKLN1		FAM198B	KRT8	SSBP2
KLK2	MLPH		FAM214A	LGALSL	ST7
KLK3	MMAA		FAM214B	LIFR	STK3
L3MBTL3	MOGAT2		FAM46C	LOC100130872	STXBP5L
LACTB2	MON1B		FFAR2	LRCH1	SYNM
LAMA1	MPZL1		FIGNL1	LRIG1	SYT17
LDLRAD3	MTERF4		FLNB	LRRFIP2	TARBP1
LIMCH1	MTMR9		FNDC3B	MAF	TLR5
LINC00883	MTOR		FOXO3	MAGEA11	TMEM117
LOC145837	MYBPC1		FOXQ1	MANF	TMEM62
LONRF1	MYOF		FRMD3	MAOA	TNFSF15
LPAR3	NAT1		FRY	MAP1B	TP53INP1
MAP2K6	NDRG1		G3BP2	MAP2K4	TRIB1
MAP7D1	NEDD4L		GC	MAP3K6	TRIM2
MAP9	NFKBIA		GCNT2	MAP7	TSPAN3
MAPK6	NIPA2		GDF15	MEIS1	VDR
MBOAT2	NKX3-1		GFM1	MIA3	WNT5A
MERTK	NNMT		GLCCI1	MPC2
MICAL1	NT5DC3		GLRX	MRPS18A
MKLN1	ODC1		GLUL	MUM1L1
MLPH	ORC5		GNMT	NAMPT
MMAA	PACS1		GOLGA3	NDFIP2
MOGAT2	PARVA		GOSR2	NEAT1
MON1B	PEA15		GP2	NRP1
MPZL1	PGC		GPER1	OTULIN
MTERF4	PHF8		GRAMD2	PAK1IP1
MTMR9	PHLDB2		GRB10	PART1
MTOR	PIAS1		GRHL2	PDE3A
MYBPC1	PIK3AP1		GRIP1	PDIA5
MYLK	PLA2G5		GTF2E2	PDLIM5
MYOF	PMEPA1		GTF3C6	PEG10
NAT1	PPAP2A		HES1	PER1
NAV3	PPAPDC2		HGD	PFKFB2
NDRG1	PPFIBP2		HIST1H4H	PGM3
NEDD4L	PPM1K		HMGCR	PICALM
NFKBIA	PPP1R15B		HMGCS1	PICK1
NIPA2	PRKCH		HMGCS2	PLA2G4E
NKX3-1	PSMD8		HOXC13	PLEKHB2
NNMT	PTGER4		HSD17B4	PLEKHG3
NT5DC3	PYGB		HSD3B1	PLOD2
ODC1	RAB3B		IGFBP3	PNLIPRP3
ORC5	RAB4A		IGSF3	PNPLA8
PACS1	RASSF3		INPP4B	PPP1CB
PAG1	RBM45		IP6K3	PPP2CB
PARVA	RFX6		IQUB	PRDM4
PEA15	RHOBTB3		ISG20	PTPN1
PGC	RHOU		JAKMIP1	PTPN21
PHF8	SASH1		KANSL1L	PTPRM
PHLDB2	SCAP		KBTBD11	RDH10
PIAS1	SGK3		KCNH2	RHOB
PIK3AP1	SHROOM3		KCNN3	ROR1
PLA2G5	SLC25A33		KCTD1	RRBP1
PLCH1	SLC30A7		KDM6A	RREB1
PLD1	SLC35F2		KIAA0232	S100P
PMEPA1	SLC38A1		KIAA1467	SC5D
POLR2M	SLC38A4		KIF13B	SDK1
PPAP2A	SLC41A1		KLF4	SEC24B
PPAPDC2	SLC43A1		KLF5	SEC24D
PPFIBP2	SMOX		KLF6	SEC61A1
PPM1K	SMS		KLHL13	SEMA6D
PPP1R15B	SNX25		KRT16	SEPP1
PRKCH	SPATA13		KRT8	SERP1
PSMD8	SPDEF		LGALSL	SETD8
PTGER4	SPRYD7		LGI2	SFXN5
PYGB	SPSB1		LIFR	SGK1
RAB3B	SSR3		LOC100130872	SH3D21
RAB4A	ST6GALNAC1		LPPR1	SIPA1L2
RASSF3	STARD13		LRCH1	SLAIN2
RASSF8	STK39		LRIG1	SLC15A2
RBM45	SWT1		LRIG3	SLC2A3
RFX6	SYNJ1		LRRC4C	SLC38A2
RHOBTB3	TARP		LRRFIP2	SLC9A3R2
RHOU	TBC1D1		MAF	SLITRK6
RIN2	TBC1D4		MAGEA11	SMPD2
SASH1	TBC1D8		MAN1A1	SNAPC1
SCAP	TBRG1		MANBA	SOCS2
SGK3	TBX15		MANEA	SORD
SHROOM3	TEX2		MANF	SPOCK1
SI	TG		MAOA	SPRY2
SLC25A33	THRAP3		MAP1B	SRM
SLC30A7	TMCC3		MAP2K4	STARD4
SLC35F2	TMEM100		MAP3K6	STEAP1
SLC38A1	TMPRSS2		MAP7	STK17B
SLC38A4	TNFAIP3		MATN2	STYK1
SLC41A1	TNFAIP8		MCTP1	TBXAS1
SLC43A1	TNFRSF10B		MEIS1	TES
SMOX	TPD52		MIA3	TFEB
SMS	TRIM36		MPC2	THRB
SNX25	TRPM8		MRPS18A	THUMPD1
SPATA13	TSKU		MUM1L1	TIPARP
SPDEF	TSPYL2		NAMPT	TM4SF1
SPRYD7	UGT2B11		NCAM2	TMEM125
SPSB1	UGT2B28		NDFIP2	TMEM164
SSR3	WIPI1		NEAT1	TMEM87B
ST6GALNAC1	WWC1		NEURL1	TMPRSS11E
STARD13	ZCCHC6		NFATC2	TMTC2
STK39	ZNF385B		NRP1	TOM1L2
STXBP6	ZNF518B		OTULIN	TPM1
SWT1	ZNF652		PAK1IP1	TRAM1
SYNJ1			PALMD	TSC22D1
TARP			PAQR5	TTN
TBC1D1			PARD3B	TUBA3D
TBC1D4			PART1	TUBA3E
TBC1D8			PCAT1	UBA6-AS1
TBRG1			PDE3A	UBE2J1
TBX15			PDIA5	UGT2B4
TEX2			PDLIM5	USP10
TG			PEG10	USP18
THRAP3			PER1	VEGFA
TLE1			PFKFB2	VIMP
TMCC3			PGAP1	VPS26B
TMEM100			PGM3	VSTM2A
TMEM65			PICALM	WDFY2
TMPRSS2			PICK1	WDR41
TNFAIP2			PIGZ	WDYHV1
TNFAIP3			PIK3R1	WWP1
TNFAIP8			PKIB	YRDC
TNFRSF10B			PKNOX2	ZBTB16
TNS1			PLA2G4E	ZDHHC9
TOX3			PLEKHB2	ZNF18
TPD52			PLEKHG3
TRIM36			PLEKHH1
TRPM8			PLOD2
TSKU			PNLIPRP3
TSPAN8			PNPLA8
TSPYL2			PPFIA2
UGT2B11			PPP1CB
UGT2B28			PPP2CB
UGT8			PRDM4
WIPI1			PREX1
WWC1			PRUNE2
YPEL2			PTGS1
ZAK			PTK7
ZBTB7C			PTP4A3
ZCCHC6			PTPN1
ZNF385B			PTPN21
ZNF518B			PTPRM
ZNF652			PTPRU
			RASL11B
			RAVER2
			RDH10
			RHOB
			RIT2
			RNF144A
			RNF144B
			ROR1
			RRBP1
			RREB1
			S100P
			SC5D
			SCUBE2
			SDK1
			SEC24B
			SEC24D
			SEC61A1
			SEMA6D
			SEPP1
			SERP1
			SETD8
			SFXN5
			SGK1
			SGMS1
			SH3D21
			SIPA1L2
			SLAIN2
			SLC15A2
			SLC16A10
			SLC25A48
			SLC27A2
			SLC2A3
			SLC30A4
			SLC38A2
			SLC7A2
			SLC9A3R2
			SLIT3
			SLITRK6
			SMOC2
			SMPD2
			SNAPC1
			SOCS2
			SORD
			SORL1
			SOWAHB
			SPOCK1
			SPRY1
			SPRY2
			SRGAP3
			SRM
			SSBP2
			ST7
			STARD4
			STEAP1
			STK17B
			STK3
			STXBP5L
			STYK1
			SYNM
			SYT17
			TARBP1
			TBXAS1
			TES
			TFEB
			THRB
			THUMPD1
			TIPARP
			TLR5
			TM4SF1
			TMEM117
			TMEM125
			TMEM164
			TMEM62
			TMEM87B
			TMPRSS11E
			TMTC2
			TNFSF15
			TOM1L2
			TP53INP1
			TPM1
			TRAM1
			TRIB1
			TRIM2
			TSC22D1
			TSPAN3
			TTN
			TUBA3D
			TUBA3E
			UBA6-AS1
			UBE2J1
			UGT2B4
			USP10
			USP18
			VDR
			VEGFA
			VIMP
			VPS26B
			VSTM2A
			WDFY2
			WDR41
			WDYHV1
			WNT5A
			WWP1
			YRDC
			ZBTB16
			ZDHHC9
			ZNF18
