# Supplementary material for: Development of Bag-1L as a therapeutic target in androgen receptor-dependent prostate cancer
Source: eLife journal article supplement (doi:10.7554/elife.27159), 2017-08-08
Supplement: supp [file elife-27159-supp-v1.zip › elife_poa_e27159_Figure_2_source_data_2.xlsx]

## Sheet: Data
Matches in Query	Total Matches	Log Odds Ratio	p-val	Resampling Adj P-val	Attrib ID	Attrib name
6	14	1.84319	4.97054e-09	<0.001	GO:0033290	eukaryotic 48S preinitiation complex
6	15	1.79486	8.2072e-09	<0.001	GO:0016282	eukaryotic 43S preinitiation complex
6	15	1.79486	8.2072e-09	<0.001	GO:0070993	translation preinitiation complex
13	35	1.75326	3.31782e-17	<0.001	GO:0022627	cytosolic small ribosomal subunit
5	14	1.72011	3.02476e-07	<0.001	GO:0005852	eukaryotic translation initiation factor 3 complex
6	18	1.6756	2.96077e-08	<0.001	GO:0001731	formation of translation preinitiation complex
32	107	1.65364	2.35593e-37	<0.001	GO:0006614	SRP-dependent cotranslational protein targeting to membrane
32	108	1.6479	3.31728e-37	<0.001	GO:0006613	cotranslational protein targeting to membrane
32	111	1.63113	9.05191e-37	<0.001	GO:0045047	protein targeting to ER
32	115	1.60971	3.28252e-36	<0.001	GO:0072599	establishment of protein localization to endoplasmic reticulum
15	51	1.60742	6.77966e-18	<0.001	GO:0022625	cytosolic large ribosomal subunit
32	120	1.58433	1.52511e-35	<0.001	GO:0070972	protein localization to endoplasmic reticulum
28	111	1.5426	2.03513e-30	<0.001	GO:0019083	viral transcription
29	117	1.53469	3.09685e-31	<0.001	GO:0000184	nuclear-transcribed mRNA catabolic process, nonsense-mediated decay
28	124	1.47944	6.12451e-29	<0.001	GO:0044391	ribosomal subunit
13	57	1.45655	4.4407e-14	<0.001	GO:0015935	small ribosomal subunit
8	35	1.45376	3.77813e-09	<0.001	GO:0004812	aminoacyl-tRNA ligase activity
8	35	1.45376	3.77813e-09	<0.001	GO:0016875	ligase activity, forming carbon-oxygen bonds
8	35	1.45376	3.77813e-09	<0.001	GO:0016876	ligase activity, forming aminoacyl-tRNA and related compounds
15	67	1.44916	6.29118e-16	<0.001	GO:0015934	large ribosomal subunit
10	46	1.42685	6.8249e-11	<0.001	GO:0006418	tRNA aminoacylation for protein translation
32	159	1.42481	2.8891e-31	<0.001	GO:0006612	protein targeting to membrane
8	39	1.39469	9.50605e-09	<0.001	GO:0000049	tRNA binding
10	49	1.39247	1.33652e-10	<0.001	GO:0043038	amino acid activation
10	49	1.39247	1.33652e-10	<0.001	GO:0043039	tRNA aminoacylation
28	148	1.3824	1.2306e-26	<0.001	GO:0019058	viral life cycle
31	167	1.37886	3.7588e-29	<0.001	GO:0044445	cytosolic part
31	177	1.34791	2.48575e-28	<0.001	GO:0000956	nuclear-transcribed mRNA catabolic process
31	183	1.33033	7.28438e-28	<0.001	GO:0006414	translational elongation
31	188	1.3162	1.73065e-27	<0.001	GO:0006402	mRNA catabolic process
43	276	1.31501	5.73056e-37	<0.001	GO:0006412	translation
35	218	1.31137	1.46971e-30	<0.001	GO:0006413	translational initiation
19	111	1.31127	1.59411e-17	<0.001	GO:0003735	structural constituent of ribosome
127	1502	1.30768	3.36012e-86	<0.001	GO:0003723	RNA binding
8	46	1.30737	3.77103e-08	<0.001	GO:0051084	'de novo' posttranslational protein folding
27	168	1.29412	1.01283e-23	<0.001	GO:0006415	translational termination
44	296	1.29317	6.43719e-37	<0.001	GO:0043043	peptide biosynthetic process
110	1141	1.29127	3.67475e-78	<0.001	GO:0044822	poly(A) RNA binding
33	216	1.28103	4.18793e-28	<0.001	GO:0006401	RNA catabolic process
8	50	1.26434	7.46838e-08	<0.001	GO:0006458	'de novo' protein folding
11	69	1.26322	2.61206e-10	<0.001	GO:0043021	ribonucleoprotein complex binding
35	244	1.25319	8.27284e-29	<0.001	GO:0090150	establishment of protein localization to membrane
11	72	1.24143	4.20432e-10	<0.001	GO:0006446	regulation of translational initiation
27	190	1.23082	2.98692e-22	<0.001	GO:0043624	cellular protein complex disassembly
44	350	1.20767	1.10263e-33	<0.001	GO:0043604	amide biosynthetic process
28	210	1.20061	2.87695e-22	<0.001	GO:0043241	protein complex disassembly
28	218	1.18178	8.17172e-22	<0.001	GO:0032984	macromolecular complex disassembly
62	580	1.17397	1.09041e-43	<0.001	GO:0030529	intracellular ribonucleoprotein complex
62	580	1.17397	1.09041e-43	<0.001	GO:1990904	ribonucleoprotein complex
44	378	1.16902	3.17378e-32	<0.001	GO:0006518	peptide metabolic process
8	61	1.16411	3.68893e-07	<0.001	GO:0008135	translation factor activity, RNA binding
11	84	1.16372	2.29985e-09	<0.001	GO:0005840	ribosome
33	275	1.15851	1.2524e-24	<0.001	GO:0006605	protein targeting
13	103	1.14714	1.24039e-10	<0.001	GO:0006364	rRNA processing
34	294	1.14232	7.98761e-25	<0.001	GO:0072657	protein localization to membrane
33	297	1.12026	1.51201e-23	<0.001	GO:0072594	establishment of protein localization to organelle
13	109	1.11912	2.55568e-10	<0.001	GO:0016072	rRNA metabolic process
11	98	1.08766	1.21116e-08	<0.001	GO:0005200	structural constituent of cytoskeleton
33	322	1.08042	2.00523e-22	<0.001	GO:0034655	nucleobase-containing compound catabolic process
10	93	1.06631	8.58829e-08	<0.001	GO:0071103	DNA conformation change
11	103	1.0634	2.05396e-08	<0.001	GO:0004386	helicase activity
47	526	1.04566	3.14409e-29	<0.001	GO:0016071	mRNA metabolic process
45	516	1.02893	1.62734e-27	<0.001	GO:0043603	cellular amide metabolic process
33	364	1.02055	9.51673e-21	<0.001	GO:0044270	cellular nitrogen compound catabolic process
33	364	1.02055	9.51673e-21	<0.001	GO:0046700	heterocycle catabolic process
33	375	1.0061	2.40238e-20	<0.001	GO:0019439	aromatic compound catabolic process
68	928	1.00411	1.61381e-37	<0.001	GO:0010467	gene expression
24	271	0.991177	4.39447e-15	<0.001	GO:0006417	regulation of translation
32	374	0.990381	2.21515e-19	<0.001	GO:0005925	focal adhesion
32	379	0.983964	3.29477e-19	<0.001	GO:0005924	cell-substrate adherens junction
32	383	0.978894	4.50671e-19	<0.001	GO:0030055	cell-substrate junction
161	5367	0.977741	1.70432e-49	<0.001	GO:1901363	heterocyclic compound binding
33	402	0.972476	2.05121e-19	<0.001	GO:1901361	organic cyclic compound catabolic process
161	5433	0.97001	1.01722e-48	<0.001	GO:0097159	organic cyclic compound binding
47	617	0.967919	3.5608e-26	<0.001	GO:0016032	viral process
47	617	0.967919	3.5608e-26	<0.001	GO:0044403	symbiosis, encompassing mutualism through parasitism
47	622	0.964005	5.05682e-26	<0.001	GO:0044764	multi-organism cellular process
33	420	0.951373	7.81878e-19	<0.001	GO:0033365	protein localization to organelle
24	295	0.950392	2.92176e-14	<0.001	GO:0034248	regulation of cellular amide metabolic process
137	3563	0.948294	1.87213e-50	<0.001	GO:0003676	nucleic acid binding
14	171	0.938207	7.64092e-09	<0.001	GO:0006399	tRNA metabolic process
11	138	0.923183	4.21991e-07	<0.001	GO:0022618	ribonucleoprotein complex assembly
20	258	0.920448	1.11418e-11	<0.001	GO:0034470	ncRNA processing
32	436	0.916589	2.05509e-17	<0.001	GO:0005912	adherens junction
29	391	0.915603	5.69349e-16	<0.001	GO:0034660	ncRNA metabolic process
49	725	0.914779	5.57598e-25	<0.001	GO:0044419	interspecies interaction between organisms
33	454	0.914004	8.21812e-18	<0.001	GO:0070161	anchoring junction
27	390	0.878915	3.3677e-14	<0.001	GO:0010608	posttranscriptional regulation of gene expression
37	562	0.874998	1.78551e-18	<0.001	GO:0006886	intracellular protein transport
36	560	0.861495	1.18008e-17	<0.001	GO:0044802	single-organism membrane organization
13	187	0.859944	1.83299e-07	<0.001	GO:0000377	RNA splicing, via transesterification reactions with bulged adenosine as nucleophile
13	187	0.859944	1.83299e-07	<0.001	GO:0000398	mRNA splicing, via spliceosome
39	624	0.854389	1.13657e-18	<0.001	GO:0044265	cellular macromolecule catabolic process
13	194	0.842691	2.80473e-07	<0.001	GO:0000375	RNA splicing, via transesterification reactions
34	558	0.831836	5.27677e-16	<0.001	GO:0005198	structural molecule activity
190	12591	0.831096	3.53262e-18	<0.001	GO:0044424	intracellular part
44	772	0.821139	1.68767e-19	<0.001	GO:0005730	nucleolus
41	711	0.820178	2.34797e-18	<0.001	GO:0016482	cytoplasmic transport
47	857	0.809371	3.71929e-20	<0.001	GO:1901566	organonitrogen compound biosynthetic process
36	628	0.806851	4.43415e-16	<0.001	GO:1902580	single-organism cellular localization
36	643	0.795617	9.25342e-16	<0.001	GO:0006396	RNA processing
41	755	0.791465	1.98402e-17	<0.001	GO:0009057	macromolecule catabolic process
41	773	0.780205	4.54715e-17	<0.001	GO:0061024	membrane organization
191	13372	0.776872	1.01703e-14	<0.001	GO:0005488	binding
34	644	0.763743	3.56476e-14	<0.001	GO:0034613	cellular protein localization
34	649	0.760075	4.45663e-14	<0.001	GO:0070727	cellular macromolecule localization
128	4292	0.755566	2.035e-33	<0.001	GO:0032991	macromolecular complex
31	592	0.754134	6.78665e-13	<0.001	GO:0022411	cellular component disassembly
45	994	0.712854	4.05077e-16	<0.001	GO:1902582	single-organism intracellular transport
18	360	0.711398	1.23536e-07	<0.001	GO:0005525	GTP binding
27	575	0.695641	2.7782e-10	<0.001	GO:0017111	nucleoside-triphosphatase activity
50	1176	0.693354	8.31747e-17	<0.001	GO:0046907	intracellular transport
18	376	0.691174	2.35574e-07	<0.001	GO:0032561	guanyl ribonucleotide binding
18	377	0.689939	2.44986e-07	<0.001	GO:0019001	guanyl nucleotide binding
53	1277	0.688275	2.17711e-17	<0.001	GO:0051704	multi-organism process
156	7687	0.666607	4.31095e-24	<0.001	GO:0044422	organelle part
27	612	0.666365	1.09042e-09	<0.001	GO:0016462	pyrophosphatase activity
27	614	0.664834	1.17047e-09	<0.001	GO:0016818	hydrolase activity, acting on acid anhydrides, in phosphorus-containing anhydrides
37	874	0.664724	1.94597e-12	<0.001	GO:0051641	cellular localization
27	616	0.663308	1.25601e-09	<0.001	GO:0016817	hydrolase activity, acting on acid anhydrides
60	1575	0.662268	5.38678e-18	<0.001	GO:1901564	organonitrogen compound metabolic process
46	1135	0.661731	1.1124e-14	<0.001	GO:0044248	cellular catabolic process
80	2330	0.660353	7.87936e-22	<0.001	GO:0043228	non-membrane-bounded organelle
80	2330	0.660353	7.87936e-22	<0.001	GO:0043232	intracellular non-membrane-bounded organelle
153	7465	0.652927	1.16444e-23	<0.001	GO:0044446	intracellular organelle part
93	3040	0.637151	2.01323e-22	<0.001	GO:0005829	cytosol
103	3577	0.635867	2.09932e-23	<0.001	GO:0044428	nuclear part
49	1324	0.624009	4.10147e-14	<0.001	GO:1901575	organic substance catabolic process
45	1196	0.623883	3.22712e-13	<0.001	GO:0045184	establishment of protein localization
42	1103	0.623736	1.59001e-12	<0.001	GO:0015031	protein transport
57	1601	0.622132	9.88102e-16	<0.001	GO:0051649	establishment of localization in cell
49	1380	0.603884	1.96697e-13	<0.001	GO:0071822	protein complex subunit organization
118	4802	0.59784	7.94669e-22	<0.001	GO:0034641	cellular nitrogen compound metabolic process
70	2232	0.588422	1.21912e-16	<0.001	GO:0000166	nucleotide binding
70	2233	0.588193	1.24834e-16	<0.001	GO:1901265	nucleoside phosphate binding
64	1995	0.585941	1.46083e-15	<0.001	GO:0043933	macromolecular complex subunit organization
89	3219	0.571079	2.87126e-18	<0.001	GO:0016070	RNA metabolic process
133	6235	0.570404	5.81146e-20	<0.001	GO:0044260	cellular macromolecule metabolic process
79	2725	0.569882	4.78017e-17	<0.001	GO:0065010	extracellular membrane-bounded organelle
79	2725	0.569882	4.78017e-17	<0.001	GO:0070062	extracellular exosome
98	3735	0.56823	6.07579e-19	<0.001	GO:0090304	nucleic acid metabolic process
79	2738	0.567384	6.31952e-17	<0.001	GO:0043230	extracellular organelle
79	2738	0.567384	6.31952e-17	<0.001	GO:1903561	extracellular vesicle
191	14860	0.566605	1.17528e-07	<0.001	GO:0044464	cell part
164	9826	0.562306	6.05768e-16	<0.001	GO:0043226	organelle
118	5153	0.554785	3.94524e-19	<0.001	GO:0006807	nitrogen compound metabolic process
55	1769	0.550946	1.01911e-12	<0.001	GO:0001882	nucleoside binding
50	1576	0.550917	7.14694e-12	<0.001	GO:0009056	catabolic process
156	8875	0.55024	1.19931e-16	<0.001	GO:0043227	membrane-bounded organelle
54	1749	0.545463	2.3112e-12	<0.001	GO:0035639	purine ribonucleoside triphosphate binding
102	4142	0.544403	6.9257e-18	<0.001	GO:0006139	nucleobase-containing compound metabolic process
54	1759	0.542642	2.8922e-12	<0.001	GO:0032550	purine ribonucleoside binding
54	1762	0.541798	3.09235e-12	<0.001	GO:0001883	purine nucleoside binding
54	1762	0.541798	3.09235e-12	<0.001	GO:0032549	ribonucleoside binding
71	2518	0.536134	1.76906e-14	<0.001	GO:0036094	small molecule binding
54	1790	0.533987	5.72904e-12	<0.001	GO:0032555	purine ribonucleotide binding
54	1799	0.531501	6.964e-12	<0.001	GO:0017076	purine nucleotide binding
35	1086	0.531403	1.23137e-08	<0.001	GO:0030054	cell junction
54	1804	0.530124	7.7569e-12	<0.001	GO:0032553	ribonucleotide binding
136	6900	0.529448	2.61641e-17	<0.001	GO:0043170	macromolecule metabolic process
77	2860	0.526006	9.47996e-15	<0.001	GO:0034645	cellular macromolecule biosynthetic process
44	1434	0.523341	5.14286e-10	<0.001	GO:0008104	protein localization
102	4325	0.5194	1.63875e-16	<0.001	GO:0046483	heterocycle metabolic process
44	1446	0.519293	6.6822e-10	<0.001	GO:0033036	macromolecule localization
51	1726	0.517876	5.69088e-11	<0.001	GO:0071702	organic substance transport
102	4343	0.516982	2.21189e-16	<0.001	GO:0006725	cellular aromatic compound metabolic process
145	7974	0.513245	8.97916e-16	<0.001	GO:0044237	cellular metabolic process
81	3141	0.512705	1.46488e-14	<0.001	GO:0009059	macromolecule biosynthetic process
81	3164	0.508781	2.22002e-14	<0.001	GO:0031988	membrane-bounded vesicle
176	12266	0.506462	1.24992e-10	<0.001	GO:0009987	cellular process
104	4563	0.505358	7.39351e-16	<0.001	GO:1901360	organic cyclic compound metabolic process
81	3205	0.501842	4.60492e-14	<0.001	GO:0044271	cellular nitrogen compound biosynthetic process
82	3290	0.496733	6.36837e-14	<0.001	GO:0031982	vesicle
99	4411	0.481836	2.11634e-14	<0.001	GO:0005737	cytoplasm
56	2123	0.470781	3.91199e-10	<0.001	GO:0097367	carbohydrate derivative binding
142	8110	0.468441	1.46426e-13	<0.001	GO:0044238	primary metabolic process
35	1244	0.466519	3.42621e-07	<0.001	GO:0044877	macromolecular complex binding
83	3544	0.465087	1.36331e-12	<0.001	GO:0044421	extracellular region part
144	8404	0.460525	5.07038e-13	<0.001	GO:0071704	organic substance metabolic process
133	7494	0.440009	1.52404e-12	<0.001	GO:0044444	cytoplasmic part
96	4531	0.439973	3.00481e-12	<0.001	GO:0071840	cellular component organization or biogenesis
150	9318	0.437013	2.01915e-11	<0.001	GO:0008152	metabolic process
141	8353	0.434379	6.55796e-12	<0.001	GO:0043229	intracellular organelle
95	4508	0.434258	6.07117e-12	<0.001	GO:0016043	cellular component organization
86	3972	0.428205	3.2988e-11	<0.001	GO:0044249	cellular biosynthetic process
71	3096	0.427522	3.93793e-10	<0.001	GO:0044267	cellular protein metabolic process
59	2469	0.426072	5.12229e-09	<0.001	GO:0043168	anion binding
87	4090	0.420423	6.14057e-11	<0.001	GO:1901576	organic substance biosynthetic process
66	2885	0.416422	2.51388e-09	<0.001	GO:0034654	nucleobase-containing compound biosynthetic process
87	4163	0.41029	1.61447e-10	<0.001	GO:0009058	biosynthetic process
60	2620	0.405908	1.79612e-08	<0.001	GO:0032774	RNA biosynthetic process
66	2951	0.40447	6.39065e-09	<0.001	GO:0018130	heterocycle biosynthetic process
58	2523	0.404354	2.99936e-08	<0.001	GO:0005654	nucleoplasm
66	2957	0.403395	6.94379e-09	<0.001	GO:0019438	aromatic compound biosynthetic process
66	3071	0.396327	1.31687e-08	<0.001	GO:1901362	organic cyclic compound biosynthetic process
90	4600	0.394439	6.3645e-10	<0.001	GO:0005634	nucleus
76	3682	0.394216	3.32192e-09	<0.001	GO:0043234	protein complex
60	2692	0.391823	4.88621e-08	<0.001	GO:0044765	single-organism transport
77	3682	0.389378	3.77839e-09	<0.001	GO:0043234	protein complex
70	3357	0.387768	1.33642e-08	<0.001	GO:0006810	transport
72	3482	0.387112	1.04579e-08	<0.001	GO:0051234	establishment of localization
61	2857	0.383639	7.82469e-08	<0.001	GO:1902578	single-organism localization
66	3071	0.383294	3.18191e-08	<0.001	GO:1901362	organic cyclic compound biosynthetic process
150	10258	0.379898	1.36652e-08	<0.001	GO:0005515	protein binding
90	4600	0.378587	2.2162e-09	<0.001	GO:0005634	nucleus
70	3357	0.374337	3.38009e-08	<0.001	GO:0006810	transport
72	3482	0.373472	2.72124e-08	<0.001	GO:0051234	establishment of localization
61	2857	0.37107	1.72753e-07	<0.001	GO:1902578	single-organism localization
152	10258	0.368057	2.41987e-08	<0.001	GO:0005515	protein binding
73	3787	0.35023	1.56337e-07	<0.001	GO:0051179	localization
119	7381	0.343611	2.63171e-08	<0.001	GO:0043231	intracellular membrane-bounded organelle
73	3755	0.341217	2.74059e-07	<0.001	GO:0019538	protein metabolic process
121	7381	0.340067	2.64354e-08	<0.001	GO:0043231	intracellular membrane-bounded organelle
73	3787	0.336482	3.86947e-07	<0.001	GO:0051179	localization
71	3755	0.335821	5.56948e-07	0.001	GO:0019538	protein metabolic process
