# Supplementary material for: Development of Bag-1L as a therapeutic target in androgen receptor-dependent prostate cancer
Source: eLife journal article supplement (doi:10.7554/elife.27159), 2017-08-08
Supplement: supp [file elife-27159-supp-v1.zip › elife_poa_e27159_Table_1_source_data_1.docx]

**Table 1-source data 1**

|  |  | **HR** | **95% CI** | **p-value** |
| --- | --- | --- | --- | --- |
| **HSPC** | **Nuclear AR expression (per 10 H-score, continuous variable)** |  |  |  |
| PSA progression | 1.03 | 0.97-1.08 | 0.31a |
| Radiological progression | 1.06 | 0.97-1.09 | 0.40a |
| Overall survival | 1.04 | 0.98-1.10 | 0.24a |
| **CRPC** | **Nuclear BAG-1 expression (per 10 H-score, continuous variable)** |  |  |  |
| PSA progression | 1.01 | 0.92-1.10 | 0.85a |
| Radiological progression | 1.01 | 0.92-1.11 | 0.84a |
| Overall survival | 0.97 | 0.90-1.05 | 0.45a |
| **Nuclear AR expression (per 10 H-score, continuous variable)** |  |  |  |
| PSA progression | 0.50 | 0.22-1.13 | 0.10a |
| Radiological progression | 1.00 | 0.95-1.05 | 0.98a |
| Overall survival | 0.98 | 0.93-1.02 | 0.33a |
