# Supplementary figures and images for: Development of Bag-1L as a therapeutic target in androgen receptor-dependent prostate cancer
Source: eLife journal article supplement (doi:10.7554/elife.27159), 2017-08-08

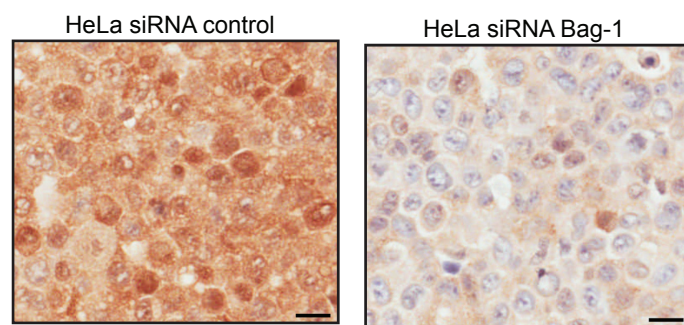

Supplement: supp [file elife-27159-supp-v1.zip]

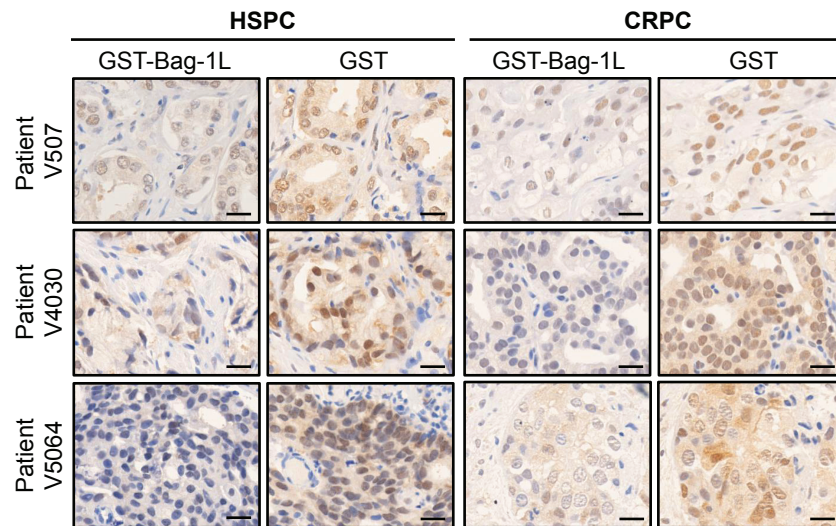

Supplement: supp [file elife-27159-supp-v1.zip]

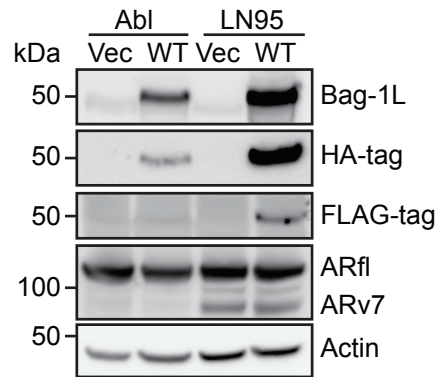

Supplement: supp [file elife-27159-supp-v1.zip]

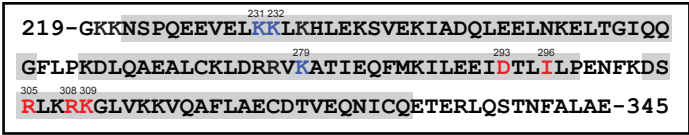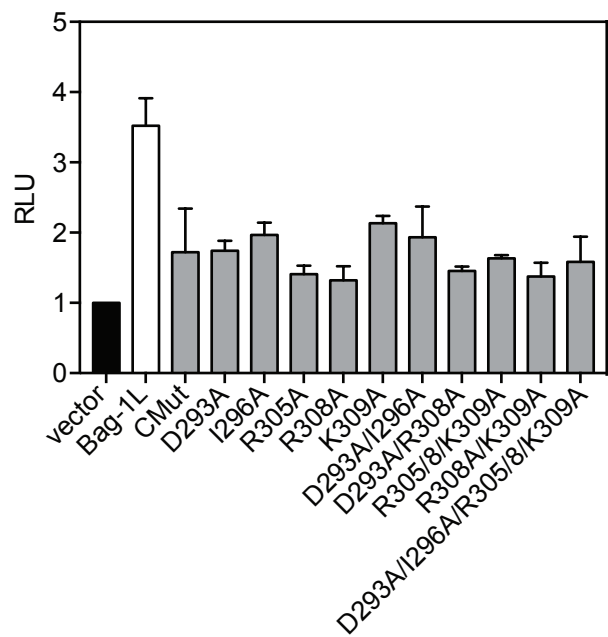

Supplement: supp [file elife-27159-supp-v1.zip]

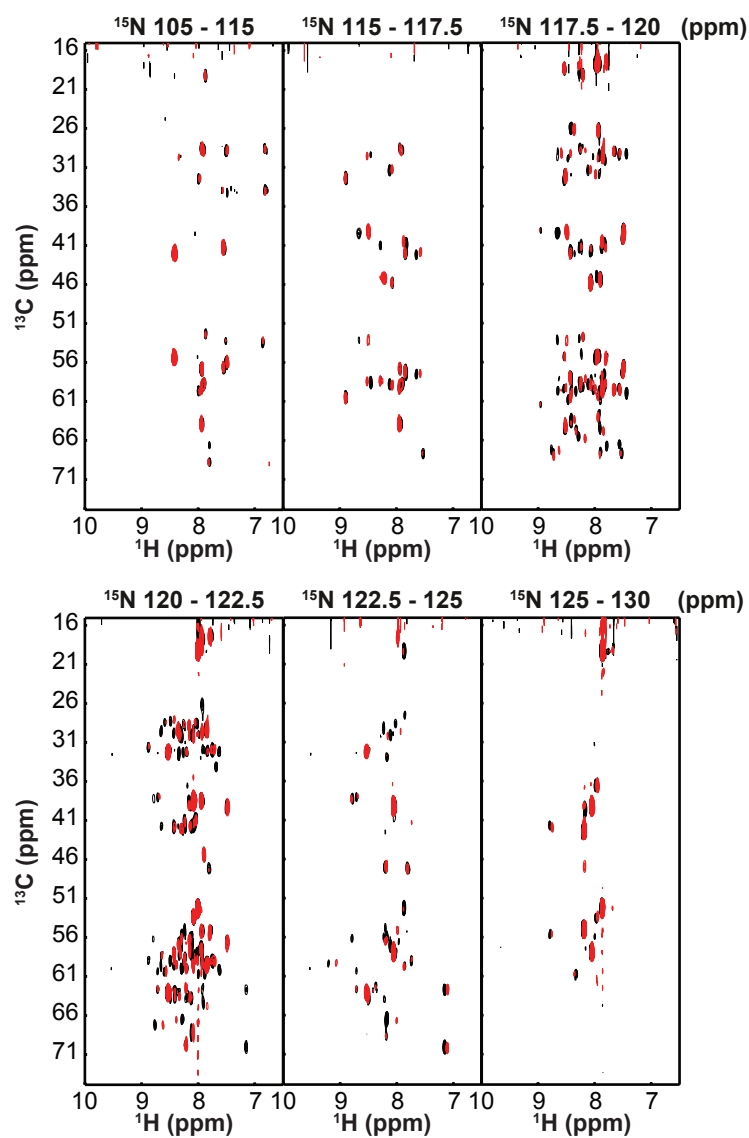

Supplement: supp [file elife-27159-supp-v1.zip]

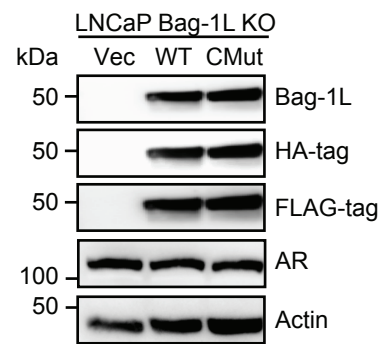

Supplement: supp [file elife-27159-supp-v1.zip]

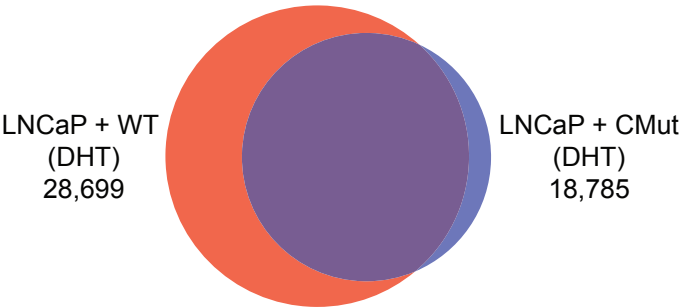

Supplement: supp [file elife-27159-supp-v1.zip]

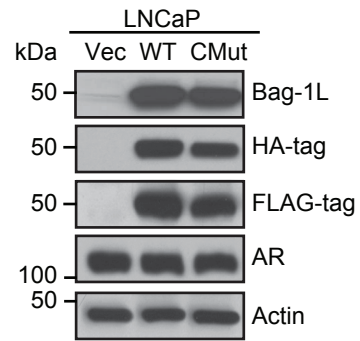

Supplement: supp [file elife-27159-supp-v1.zip]

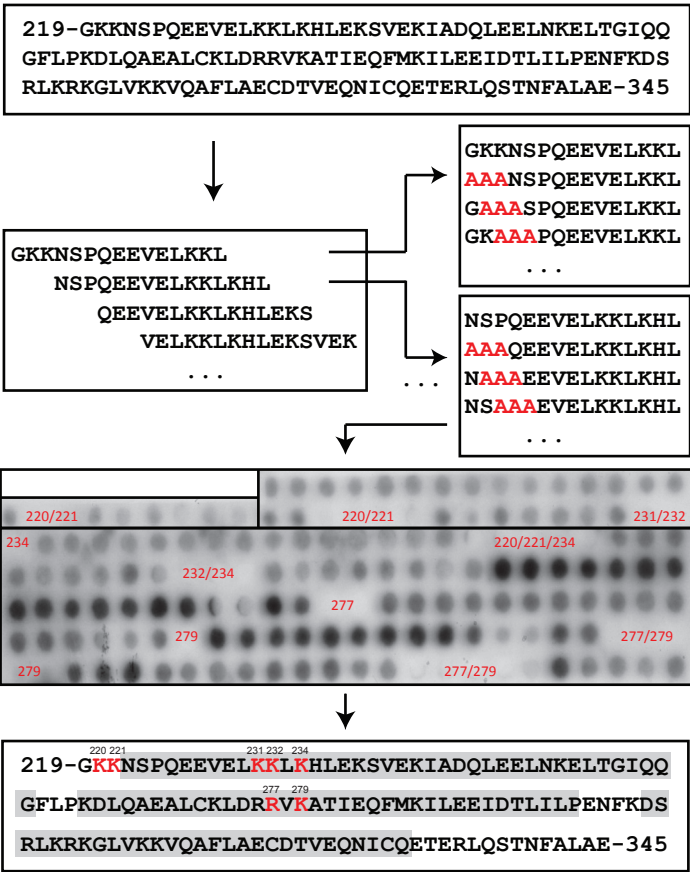

Supplement: supp [file elife-27159-supp-v1.zip]

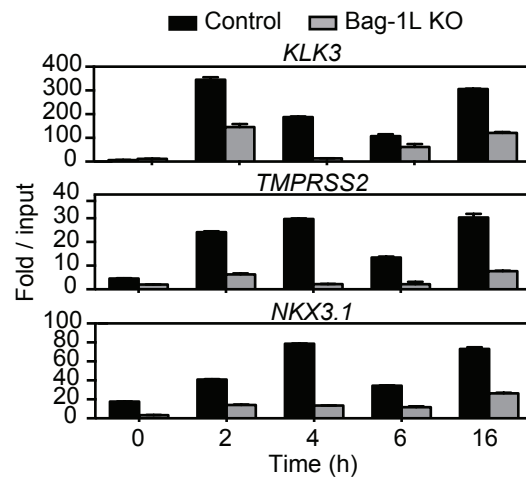

Supplement: supp [file elife-27159-supp-v1.zip]

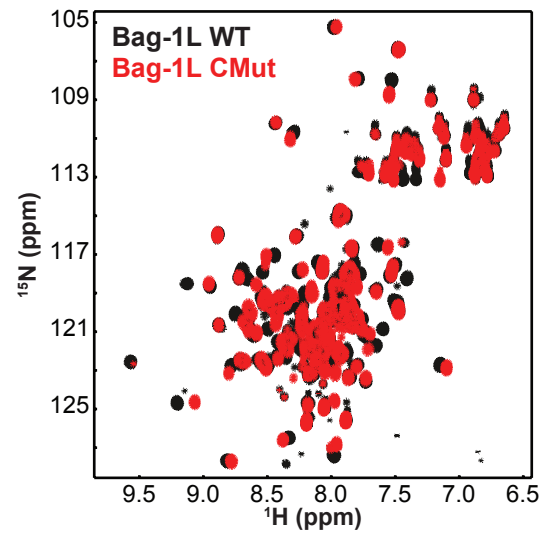

Supplement: supp [file elife-27159-supp-v1.zip]

Figure 2-figure supplement 3; Cato *et al.*, 2017

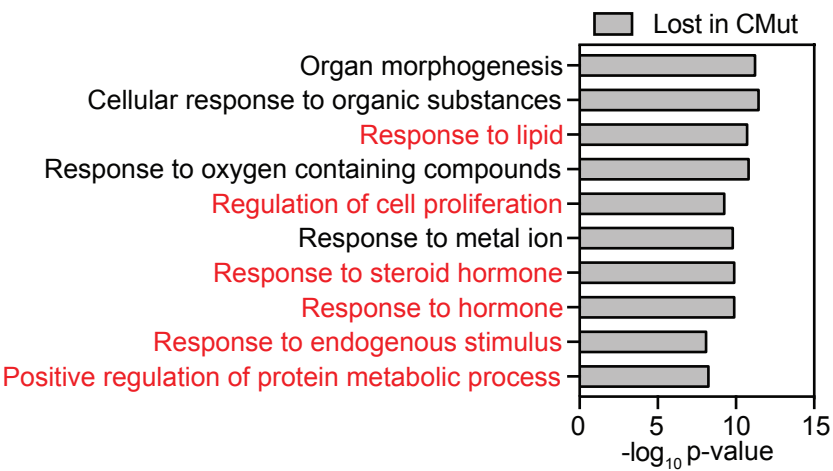

Supplement: supp [file elife-27159-supp-v1.zip]

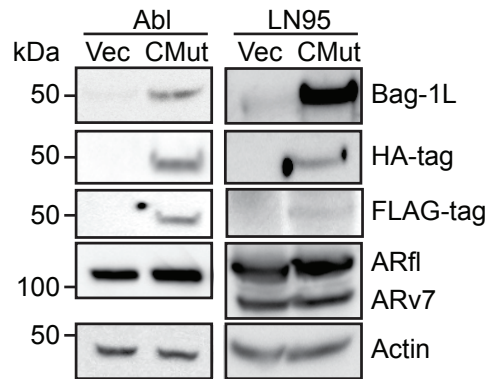

Supplement: supp [file elife-27159-supp-v1.zip]

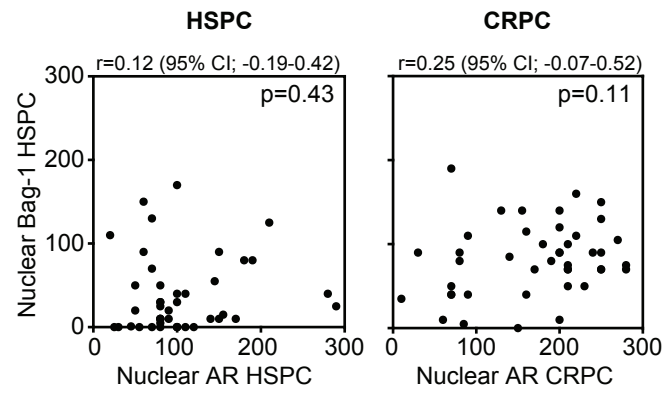

Supplement: supp [file elife-27159-supp-v1.zip]

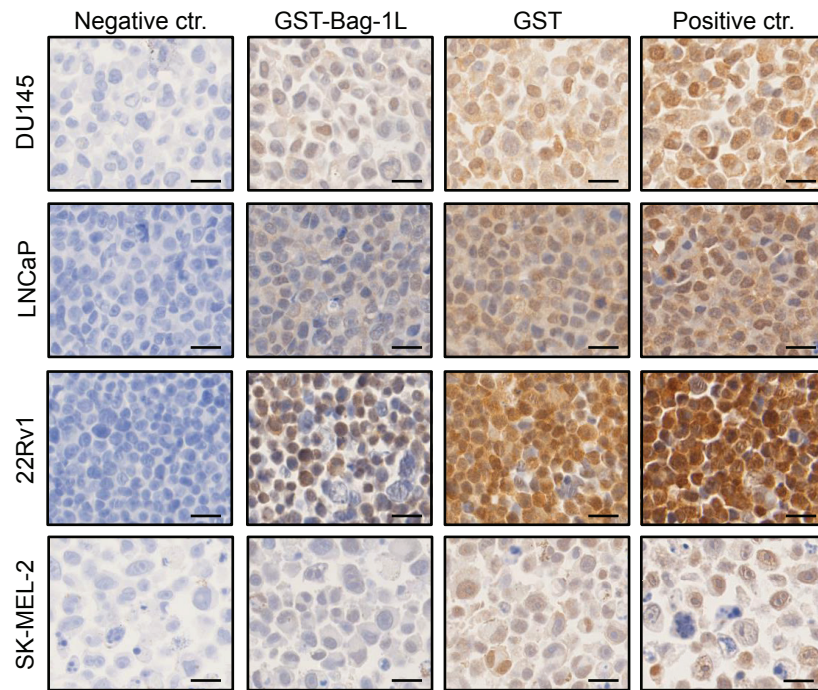

Supplement: supp [file elife-27159-supp-v1.zip]

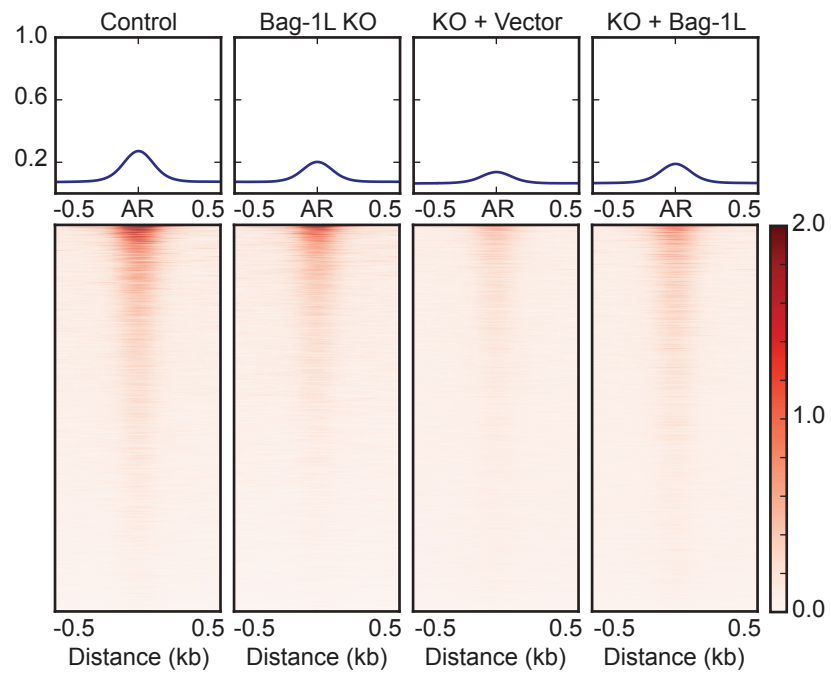

Supplement: supp [file elife-27159-supp-v1.zip]

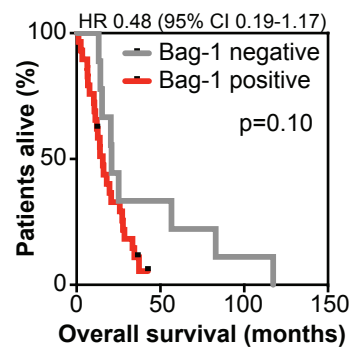

Supplement: supp [file elife-27159-supp-v1.zip]

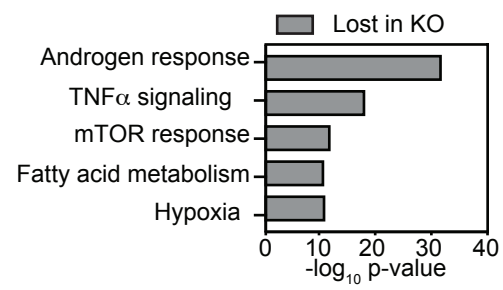

Supplement: supp [file elife-27159-supp-v1.zip]

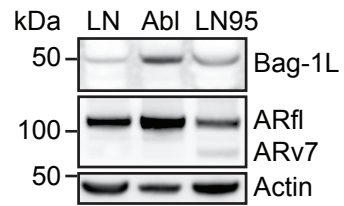

Supplement: supp [file elife-27159-supp-v1.zip › elife_poa_e27159_Figure_5_figure_supplement_4.pdf]
